# Supplementary material for: Translational repression by 4E-T is crucial to maintain the prophase-I arrest in vertebrate oocytes
Source: Springer Nature journal article supplement (doi:10.1038/s41467-025-62971-9), 2025-08-28
Supplement: MOESM1 [file 41467_2025_62971_MOESM1_ESM.pdf › 41467_2025_62971_MOESM1_ESM.pdf]

# Supplementary Figure 1

**a**

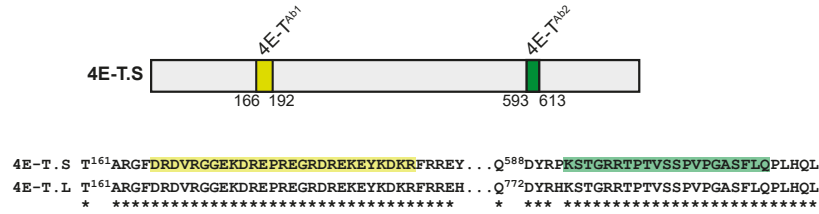

**b**

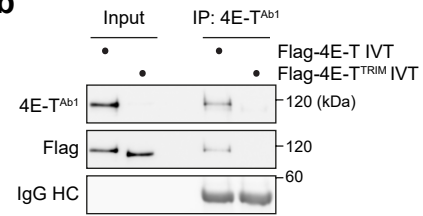

**c**

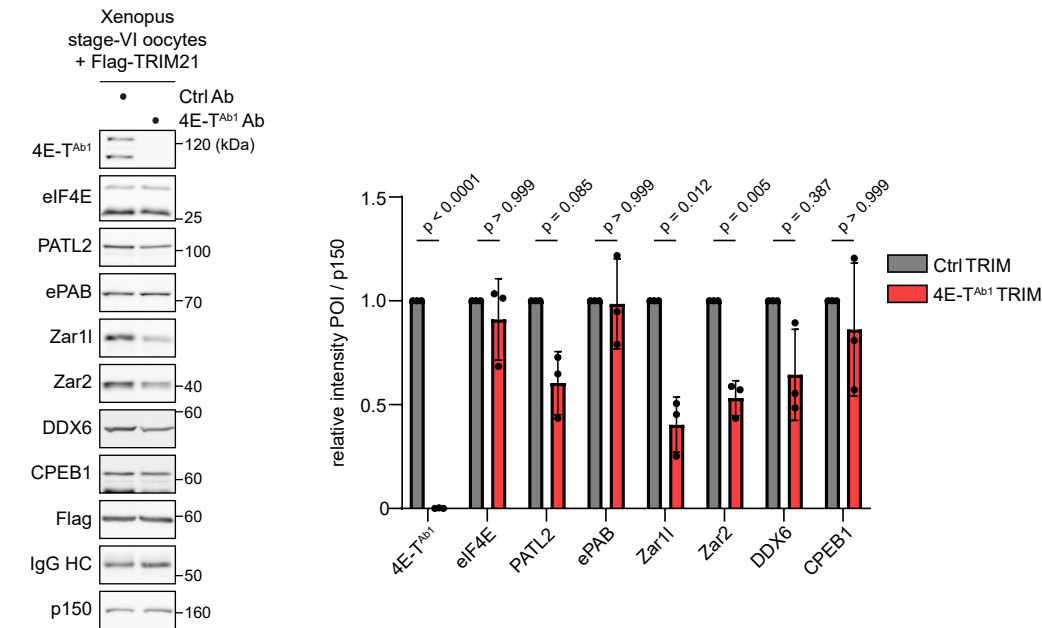

**d**

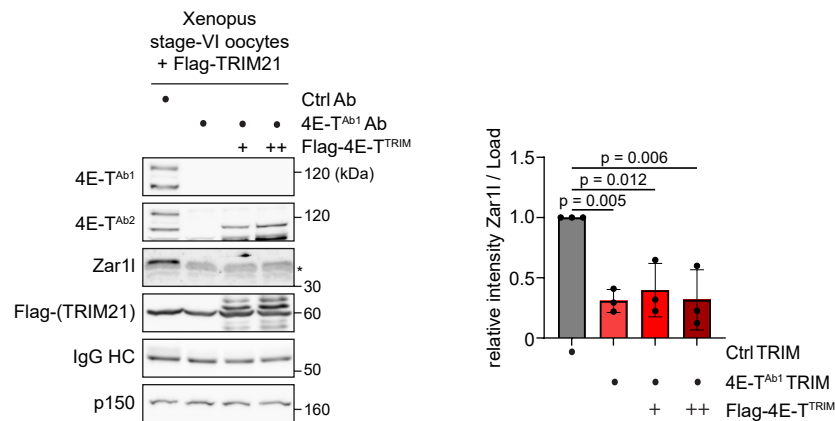

**e**

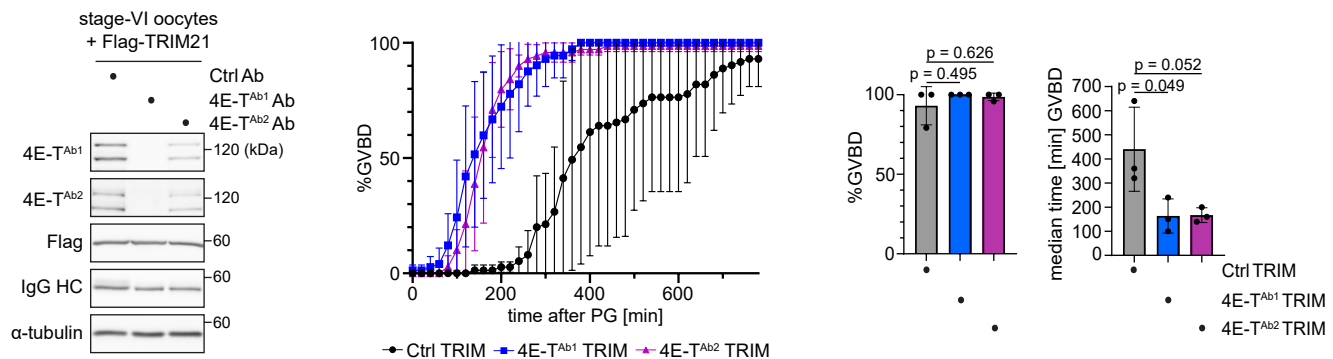

### Supplementary Fig. 1

a) Schematic representation of 4E-T.S from *Xenopus laevis*. The antigens used for the generation of 4E-T<sup>Ab1</sup> and 4E-T<sup>Ab2</sup> are highlighted in yellow and green, respectively. *In vitro* translation reactions (IVT) of Flag-4E-T.S were immunoblotted as indicated. An IVT reaction not expressing a specific protein (Empty IVT) was loaded as a control. Where indicated Flag-4E-T.S IVT was mixed with lysate of *Xenopus* stage-VI oocytes.

b) IVT reactions expressing Flag-4E-T or Flag-4E-T<sup>TRIM</sup> were subjected to immunoprecipitation with 4E-T<sup>Ab1</sup>. Input and IP samples were immunoblotted as indicated.

c) *Xenopus* stage-VI oocytes were injected with 4E-T<sup>Ab1</sup> or unspecific control (Ctrl) antibodies and mRNA encoding Flag-TRIM21. 22h after injection, oocytes were lysed and analyzed by immunoblotting. Protein signals were quantified and normalized to p150. Values were normalized to the Ctrl TRIM condition and are given as mean±s.d. from three independent biological replicates. p-values were calculated using unpaired two-sided t-test with Bonferroni-Dunn correction for multiple comparisons.

d) *Xenopus* stage-VI oocytes were injected with water or mRNA encoding Flag-4E-T<sup>TRIM</sup>. 18h after injection, oocytes were co-injected with mRNA encoding Flag-TRIM21 and either 4E-T<sup>Ab1</sup> or unspecific control (Ctrl) antibodies. 22h after the second injection, oocytes were lysed for immunoblotting as indicated. Zar1l signals were quantified and normalized to load. Values were normalized to the Ctrl TRIM condition and are given as mean±s.d. from three independent biological replicates. p-values were calculated using one-way ANOVA with Tukey's multiple comparisons test.

e) *Xenopus* stage-VI oocytes were injected with the indicated 4E-T or unspecific control (Ctrl) antibodies and mRNA encoding Flag-TRIM21. 22h after injection, some oocytes were lysed for immunoblotting. The residual oocytes (Ctrl TRIM, n=74 oocytes; 4E-T<sup>Ab1</sup> TRIM, n=73 oocytes; 4E-T<sup>Ab2</sup> TRIM, n=69 oocytes) were treated with PG and time until GVBD was determined. In addition, percentage of oocytes undergoing GVBD in 780min after PG addition and median time to GVBD were quantified. All values are given as mean±s.d. from three independent biological replicates. p-values were calculated using one-way ANOVA with Tukey's multiple comparisons test.

Source data including additional loading controls are provided as a Source Data file.

Supplementary Figure 2

a

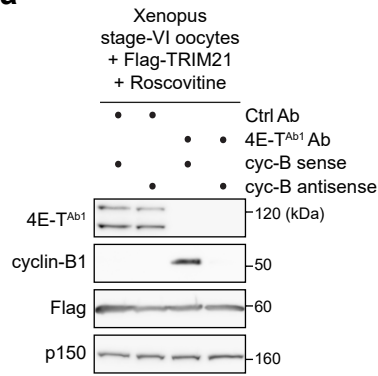

b

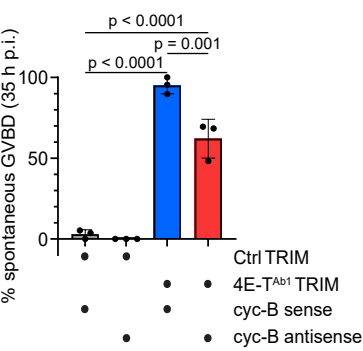

c

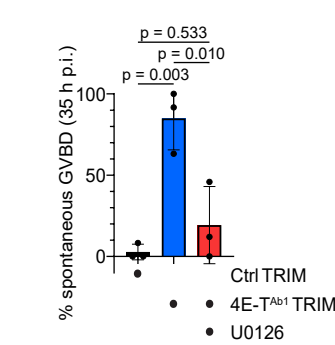

## Supplementary Fig. 2

a) *Xenopus* stage-VI oocytes were co-injected with mRNA encoding Flag-TRIM21, 4E-T<sup>Ab1</sup> or unspecific control (Ctrl) antibodies and cyc-B sense or antisense oligonucleotide mix. Oocytes were incubated in medium containing the Cdk inhibitor Roscovitine. 48h after injection, oocytes were lysed and immunoblotted as indicated. One representative experiment of three independent biological replicates is shown.

b) *Xenopus* stage-VI oocytes were co-injected with mRNA encoding Flag-TRIM21, 4E-T<sup>Ab1</sup> or unspecific control (Ctrl) antibodies and cyc-B sense or antisense oligonucleotide mix. 35h after injection, the occurrence of GVBD was determined by the appearance of a white spot in the animal hemisphere of the oocytes (Ctrl TRIM + cyc-B sense, n=69 oocytes; Ctrl TRIM + cyc-B antisense, n=68 oocytes; 4E-T<sup>Ab1</sup> TRIM + cyc-B sense, n=69 oocytes; 4E-T<sup>Ab1</sup> TRIM + cyc-B antisense, n=71 oocytes). Percentage of oocytes with GVBD spots is given as mean±s.d. from three independent biological replicates. p-values were calculated using one-way ANOVA with Tukey's multiple comparisons test.

c) *Xenopus* stage-VI oocytes were co-injected with mRNA encoding Flag-TRIM21 and 4E-T<sup>Ab1</sup> or unspecific control (Ctrl) antibodies. As indicated, oocytes were treated with the MEK inhibitor U0126. 35h after injection, the occurrence of GVBD was determined by the appearance of a white spot in the animal hemisphere of the oocytes (Ctrl TRIM + DMSO, n=69 oocytes; 4E-T<sup>Ab1</sup> TRIM + DMSO, n=69 oocytes; 4E-T<sup>Ab1</sup> TRIM + U0126, n=69 oocytes). Percentage of oocytes with GVBD spots is given as mean±s.d. from three independent biological replicates. p-values were calculated using one-way ANOVA with Tukey's multiple comparisons test.

Source data including additional loading controls are provided as a Source Data file.



Supplementary Figure 3

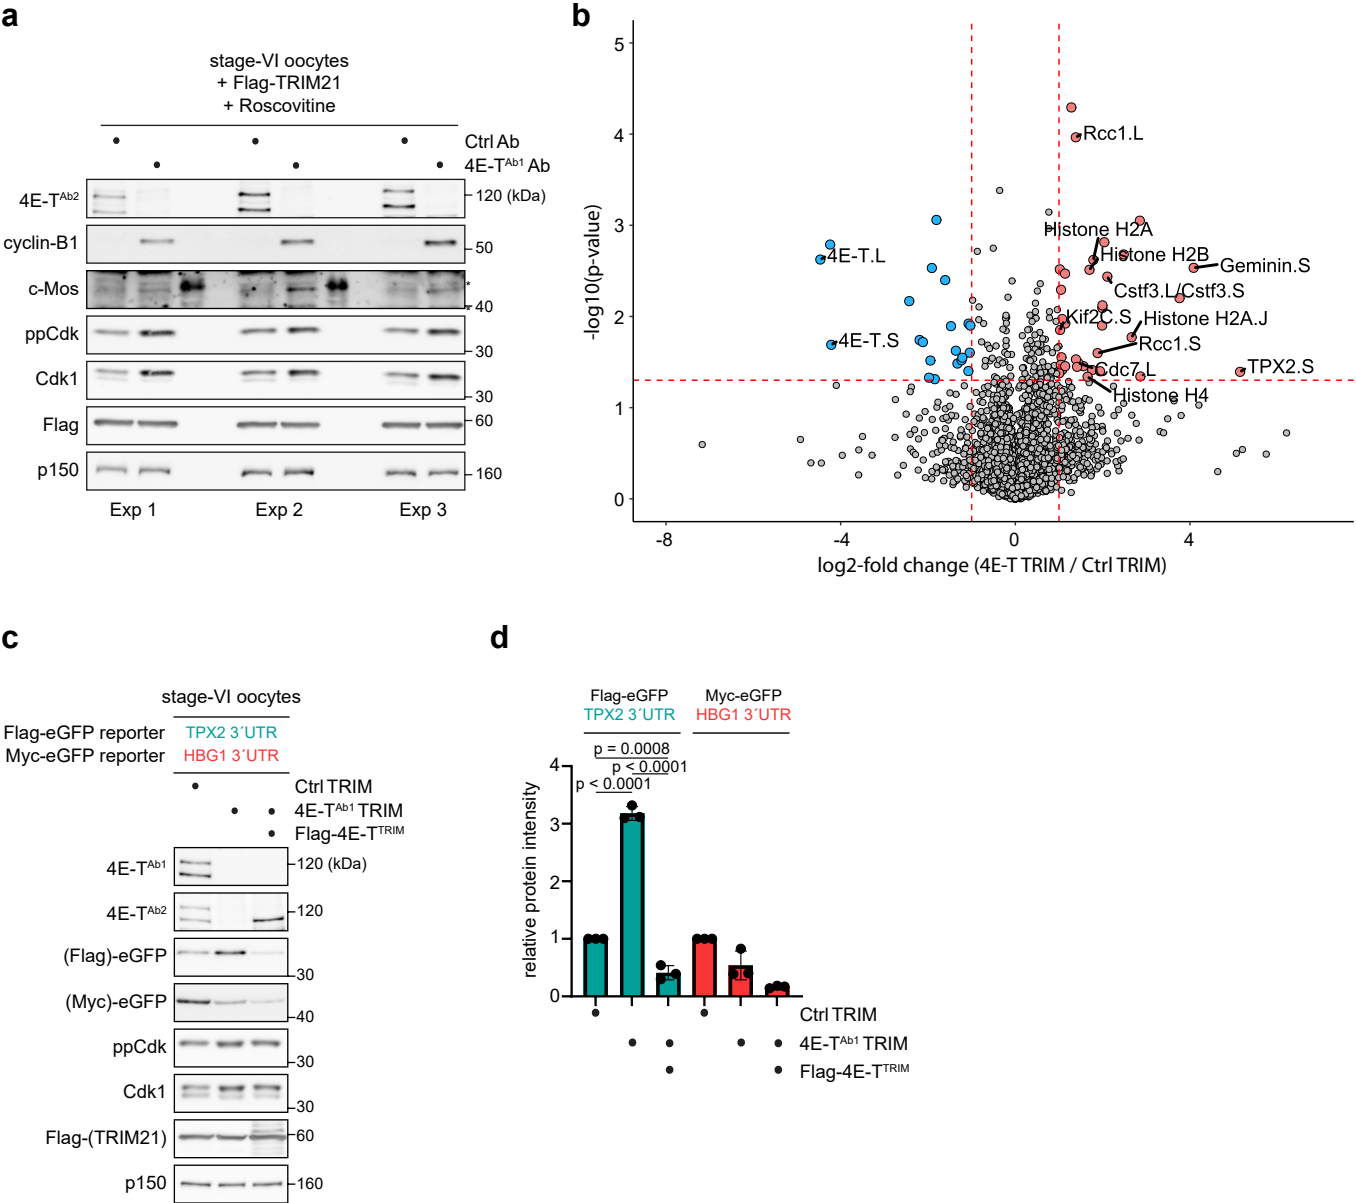

### Supplementary Fig. 3

a) *Xenopus* stage-VI oocytes were co-injected with mRNA encoding Flag-TRIM21 and 4E-T<sup>Ab1</sup> or unspecific control (Ctrl) antibodies. Oocytes were incubated in medium containing the Cdk inhibitor Roscovitine. 42h after injection, oocytes were lysed and immunoblotted as indicated. Three independent biological replicates are shown. Asterisks indicate unspecific bands.

b) Proteins in oocyte lysates of all three biological replicates from a) were identified using LC-MS/MS analysis. Volcano plot shows difference in protein expression between 4E-T TRIM and Ctrl TRIM conditions. Selected significantly enriched proteins ( $\log_2$ -fold change  $>1$  and  $p < 0,05$  as determined by an unpaired Student's t-test ( $n=3$ )) are highlighted in red (enriched in 4E-T TRIM) and blue (depleted in 4E-T TRIM), respectively.

c) *Xenopus* stage-VI oocytes were injected with water or mRNA encoding Flag-4E-T<sup>TRIM</sup>. 18h after injection, oocytes were co-injected with mRNA encoding Flag-TRIM21, with 4E-T<sup>Ab1</sup> or unspecific control (Ctrl) antibodies, with mRNA encoding Myc-eGFP\_HBG1 3'UTR and with mRNA encoding Flag-eGFP\_TPX2 3'UTR. Oocytes were incubated in medium containing the Cdk inhibitor Roscovitine, lysed after 22h and immunoblotted as indicated. Asterisks indicate unspecific bands. One representative experiment of three independent biological replicates is shown.

d) eGFP signals in c) were quantified and normalized to p150. Values were normalized to the Ctrl TRIM condition and are given as mean $\pm$ s.d. from three independent biological replicates. p-values were calculated using one-way ANOVA with Tukey's multiple comparisons test.

Source data including additional loading controls are provided as a Source Data file.

Supplementary Figure 4

a

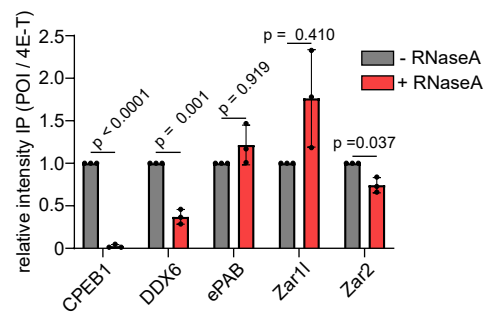

b

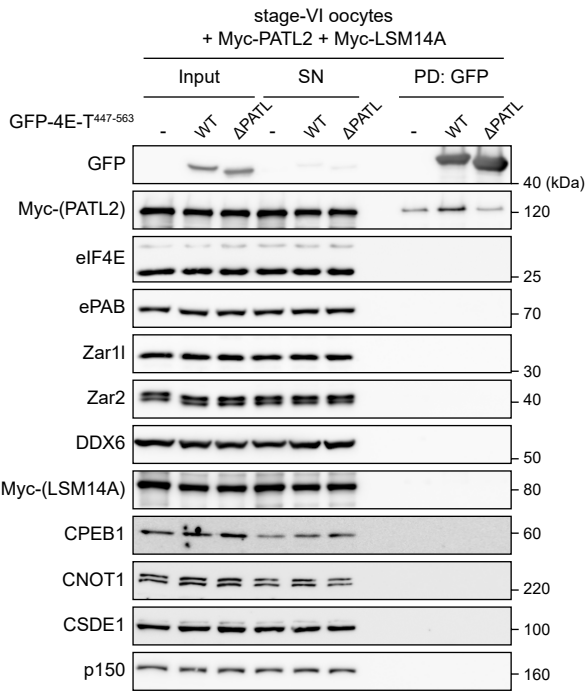

#### **Supplementary Fig. 4**

a) Quantification of Fig. 3a. Protein signals in IP samples were quantified. Signals in Ctrl IP samples were subtracted from signals in 4E-T<sup>Ab1</sup> IP samples and values were normalized to 4E-T. Values were normalized to IP without RNaseA and are given as mean±s.d. from three independent biological replicates. p-values were calculated using unpaired two-sided t-test with Bonferroni-Dunn correction for multiple comparisons.

b) *Xenopus* stage-VI oocytes were injected with water or mRNA encoding the indicated GFP-4E-T<sup>447-563</sup> variant. 18h after injection, oocytes were lysed and subjected to pull-down against the GFP-tag. Samples were immunoblotted as indicated. One representative experiment of three independent biological replicates is shown.

Source data including additional loading controls are provided as a Source Data file.

Supplementary Figure 5

a

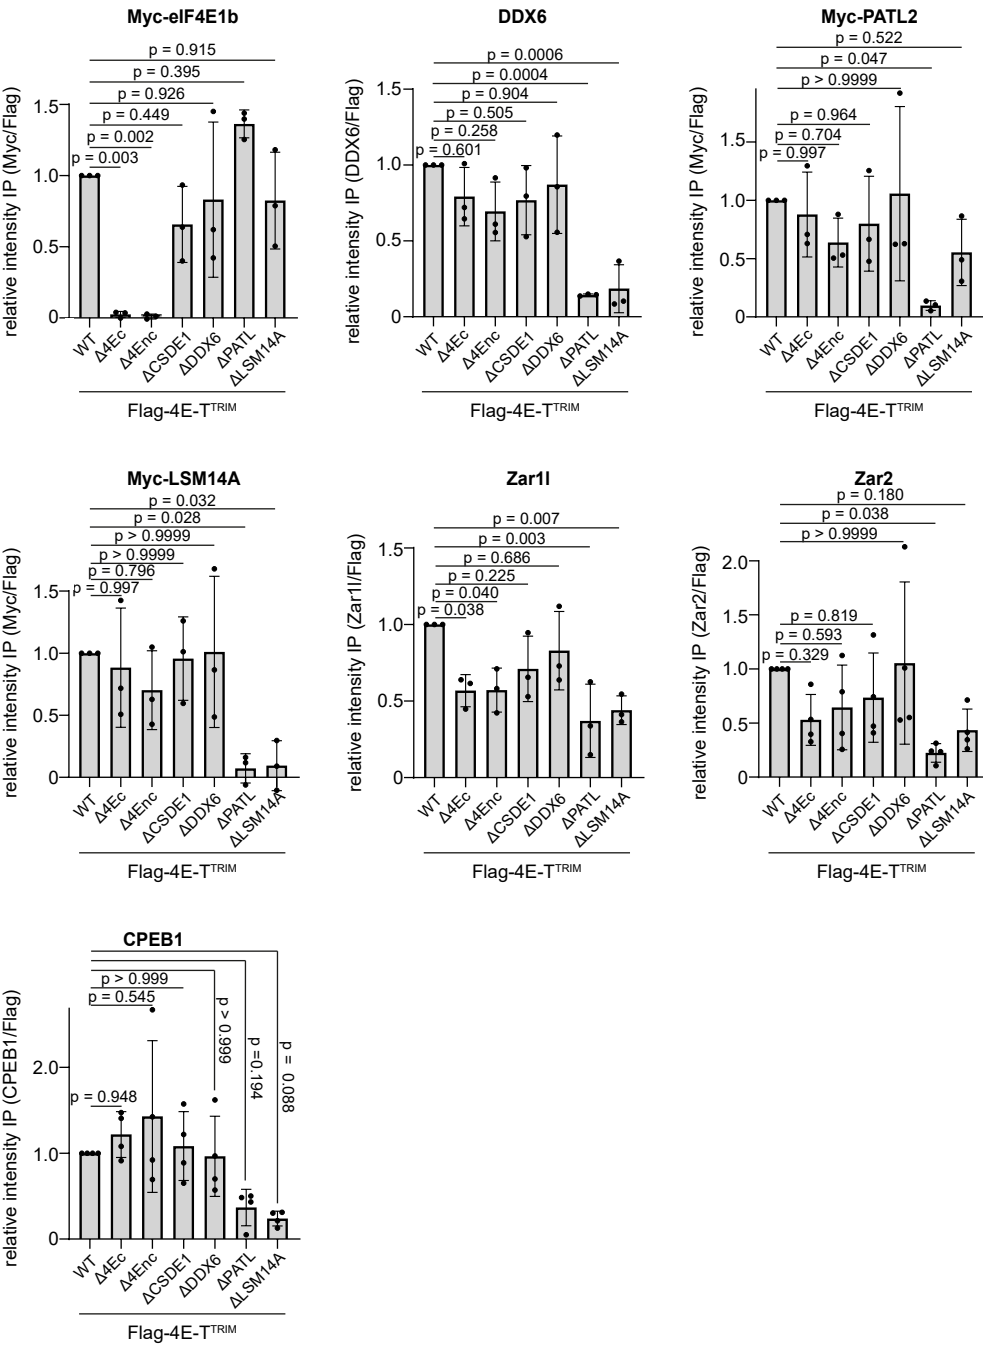

### **Supplementary Fig. 5**

a) Quantification of Figs. 4b and 4c. Protein signals in IP samples were quantified. Signals in IP samples of water-injected oocytes were subtracted and values were normalized to Flag. All conditions were normalized to WT and values are given as mean $\pm$ s.d. from three (for Myc-eIF4E1b, DDX6, Myc-PATL2, Myc-LSM14A and Zar1l) or four (for Zar2 and CPEB1) independent biological replicates. p-values were calculated using one-way ANOVA with Dunnett's multiple comparisons test. Source data are provided as a Source Data file.

Supplementary Figure 6

a

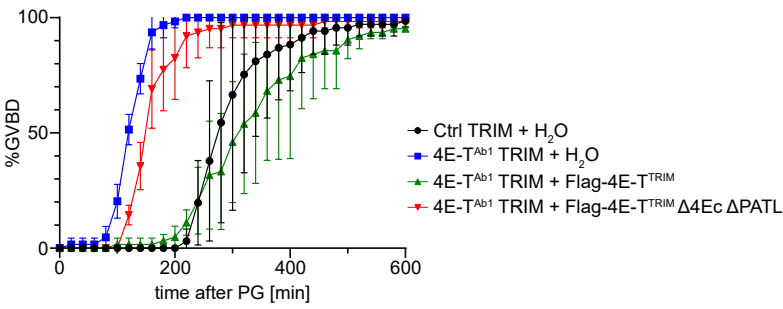

b

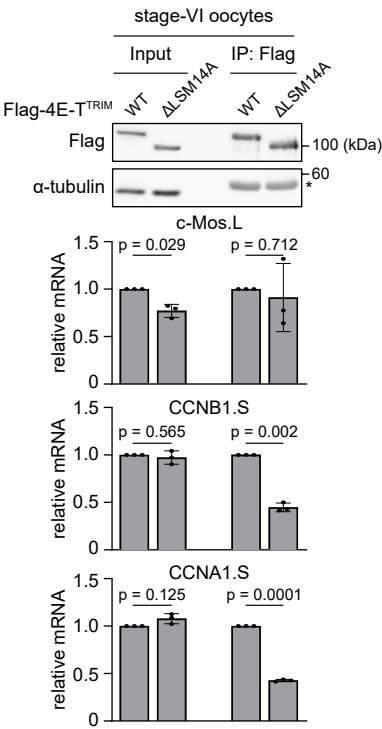

### **Supplementary Fig. 6**

a) Additional quantification of GVBD timing from experiments in Fig. 5d.

b) *Xenopus* stage-VI oocytes were injected with mRNA encoding Flag-4E-T<sup>TRIM</sup> WT or  $\Delta$ LSM14A. 18h after injection, oocytes were lysed and subjected to immunoprecipitation with Flag antibodies. Samples were immunoblotted as indicated. Asterisk indicates IgG HC. In parallel, RNA was isolated from the same samples and analyzed by qRT-PCR for the indicated mRNAs. Values in input and IP samples were normalized to the Flag-4E-T<sup>TRIM</sup> WT conditions and are given as mean $\pm$ s.d. from three independent biological replicates. p-values were calculated using unpaired two-sided t-test with Welch's correction.

Source data are provided as a Source Data file.



Supplementary Figure 7

a

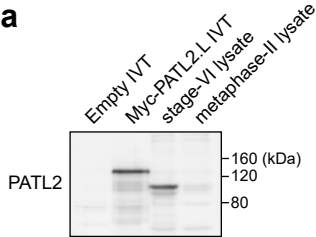

b

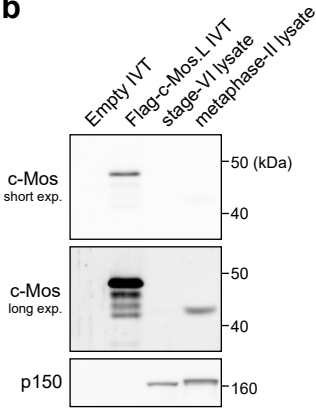

c

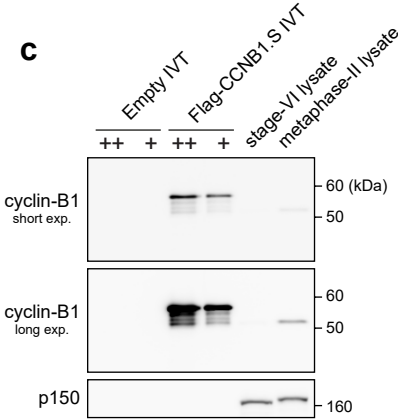

### **Supplementary Fig. 7**

a) *In vitro* translation reactions (IVT) expressing Myc-PATL2.L or no specific protein (Empty) and lysates of *Xenopus* stage-VI or metaphase-II-arrested oocytes were immunoblotted as indicated.

b) *In vitro* translation reactions (IVT) expressing Flag-c-Mos.L or no specific protein (Empty) and lysates of *Xenopus* stage-VI or metaphase-II-arrested oocytes were immunoblotted as indicated.

c) *In vitro* translation reactions (IVT) expressing Flag-CCNB1.S or no specific protein (Empty) and lysates of *Xenopus* stage-VI or metaphase-II-arrested oocytes were immunoblotted as indicated.

Source data are provided as a Source Data file.

**Supplementary Table 1. Oligonucleotide Primer Sequences**

|                                             |                                                                                                                |
|---------------------------------------------|----------------------------------------------------------------------------------------------------------------|
| 4E-T.S Fse1 fwd                             | ATTAGGCCGCGCCCATGGATTATAGAGAAGAGACA<br>GATC                                                                    |
| 4E-T.S Asc1 rev                             | TAATGGCGCGCCTCACTGTCTATACTCCAGTTCAT<br>C                                                                       |
| 4E-T TRIM-res ( $\Delta$ 169-189) fwd       | AGAGGATTTGACAGAGATGACAAACGCTTCAGGC<br>GAGAATAT                                                                 |
| 4E-T TRIM-res ( $\Delta$ 169-189) rev       | ATATTCTCGCCTGAAGCGTTTGTCTCTCTGTCAA<br>ATCCTCT                                                                  |
| 4E-T Gln319 Asc1 rev                        | TAATGGCGCGCCTCATTGATTTCTTGAAGCCAGGC<br>CTG                                                                     |
| 4E-T $\Delta$ 4Ec ( $\Delta$ 28-34) fwd     | GGCAGATCTCATCACAGTGACATCAAAGAACTTCC<br>ACACTCC                                                                 |
| 4E-T $\Delta$ 4Ec ( $\Delta$ 28-34) rev     | GGAGTGTGGAAGTTCTTTGATGTCACTGTGATGAG<br>ATCTGCC                                                                 |
| 4E-T $\Delta$ 4Enc ( $\Delta$ 51-65) fwd    | AGGCCCTCTTGTGTTGCTTTCTTCCCTCTACCCAAA<br>CTCAGGG                                                                |
| 4E-T $\Delta$ 4Enc ( $\Delta$ 51-65) rev    | CCCTGAGTTTGGGTAGAGGGAAGAAAGCAAACAA<br>GAGGGCCT                                                                 |
| 4E-T $\Delta$ CSDE1 ( $\Delta$ 130-160) fwd | CACGTTACAGCTGCTGCCACTGCAAGAGGATTTGA<br>CAGAGAT                                                                 |
| 4E-T $\Delta$ CSDE1 ( $\Delta$ 130-160) rev | ATCTCTGTCAAATCCTCTTGCACTGGCAGCAGCTG<br>TAACGTG                                                                 |
| 4E-T $\Delta$ DDX6 ( $\Delta$ 218-239) fwd  | TCTTGACAGAGGAGGAAAAAATTCTGGAAGAGGA<br>TCAGAAG                                                                  |
| 4E-T $\Delta$ DDX6 ( $\Delta$ 218-239) rev  | CTTCTGATCCTCTTCCAGAATTTTTCTCCTCTGT<br>ACAAGA                                                                   |
| 4E-T $\Delta$ PATL ( $\Delta$ 504-522) fwd  | ACAAGCATGCTATCTCCAGATGAACCTACAGAAAA<br>GCAAAAT                                                                 |
| 4E-T $\Delta$ PATL ( $\Delta$ 504-522) rev  | ATTTTGCTTTTCTGTAGTTTCATCTGGAGATAGCAT<br>GCTTGT                                                                 |
| 4E-T Met725 Asc1 rev                        | TAATGGCGCGCCTCACATGTTGGGGCGGTTTGTCTC                                                                           |
| 4E-T.S Gln447 Fse1 fwd                      | ATTAGGCCGCGCCCAAGCTGCCAACTACTATCAC                                                                             |
| 4E-T.S Gly563 Asc1 rev                      | TAATGGCGCGCCTCATCCCATCACCAGGGATGTG<br>TC                                                                       |
| PATL2.L Fse1 fwd                            | ATTAGGCCGCGCCCATGAATCTCGGCTCCGAAC                                                                              |
| PATL2.L Asc1 rev                            | TAATGGCGCGCCTCATGAAGGTACAGCTGTGTAT<br>G                                                                        |
| LSM14A.L Fse1 fwd                           | ATTAGGCCGCGCCAATGAGCGGGGGTACTCC                                                                                |
| LSM14A.L Asc1 rev                           | TAATGGCGCGCCCTAGGCTGCCACTTTGTTGTC                                                                              |
| eIF4E1b.S Fse1 fwd                          | ATTAGGCCGCGCCAATGGCAGCAGCTGAAGCATTAA<br>AG                                                                     |
| eIF4E1b.S Asc1 rev                          | TAATGGCGCGCCTCAGACCACAACTTGTTCTTGG<br>A                                                                        |
| c-Mos.L 3'UTR Xba1 fwd                      | ATTATCTAGACGTCCAGAACAGGGAGC                                                                                    |
| c-Mos.L 3'UTR+5A Xba1 rev                   | TAATTCTAGATTTTTAGACAAATCAATTTCTTTATTA<br>TAAACTATATATTCACATATG                                                 |
| CCNB1.S 3'UTR+5A Xba1 Oligo 1               | ATTATCTAGAGACACTTGTTATATTGTAGAACATTT<br>TTAACCAATGCTCTTACTGTGTATTTTATTATTTTAA<br>TAAAGATTATTTTGAAAAATCTAGAATTA |
| CCNB1.S 3'UTR+5A Xba1 Oligo 2               | TAATTCTAGATTTTTCAAAATAATCTTTATTAAATA<br>ATAAAATACACAGTAAGAGCATTGGTTAAAAATGTT<br>CTACAATATAACAAGTGTCTCTAGATAAT  |
| CCNA1.S 3'UTR Xba1 fwd                      | ATTATCTAGAAGCCTTCCAGAGTGGACG                                                                                   |
| CCNA1.S 3'UTR+5A Xba1 rev                   | TAATTCTAGATTTTTACCGTTTGAGTAAAGTCAGTT<br>TATTAAAAAC                                                             |
| TPX2.S 3'UTR Xba1 fwd                       | ATTATCTAGATGTGCTCCCTGTACTAAGCAAATC                                                                             |

|                                                        |                                                                                |
|--------------------------------------------------------|--------------------------------------------------------------------------------|
| TPX2.S 3'UTR+5A Xba1 rev                               | TAATTCTAGATTTTTCAACTTTACATTTCCACAGTTT<br>ATTACAG                               |
| Hbg1.L 3'UTR Xba1 fwd                                  | ATTATCTAGAACCAGCCTCAAGAACACCC                                                  |
| Hbg1.L 3'UTR+5A Xba1 rev                               | TAATTCTAGATTTTTGTGAAGAACTTTCTTTTTATT<br>AGGAGCAG                               |
| Flag-eGFP_c-Mos 3'UTR PCR for mRNA<br>template fwd     | GCCATTCTGCCTGGGG                                                               |
| Flag-eGFP_c-Mos 3'UTR+30A PCR for<br>mRNA template rev | TTTTTTTTTTTTTTTTTTTTTTTTTTTTTTAGACAAAT<br>CAATTTCTTTATTATAAAACTATATATTCACATATG |
| Flag-eGFP_CCNB1 3'UTR PCR for mRNA<br>template fwd     | GCCATTCTGCCTGGGG                                                               |
| Flag-eGFP_CCNB1 3'UTR+30A PCR for<br>mRNA template rev | TTTTTTTTTTTTTTTTTTTTTTTTTTTTTCAAATAAT<br>CTTTATTAATAATAATAACACAGTAAGAGC        |
| Flag-eGFP_CCNA1 3'UTR PCR for mRNA<br>template fwd     | GCCATTCTGCCTGGGG                                                               |
| Flag-eGFP_CCNA1 3'UTR+30A PCR for<br>mRNA template rev | TTTTTTTTTTTTTTTTTTTTTTTTTTTACCGTTTG<br>AGTAAAGTCAGTTTATTAATAAAC                |
| Flag-eGFP_TPX2 3'UTR+30A PCR for<br>mRNA template rev  | TTTTTTTTTTTTTTTTTTTTTTTTTTTCAACTTTAC<br>ATTTCCACAGTTTATTACAG                   |
| Myc-eGFP_HBG1 3'UTR PCR for mRNA<br>template fwd       | GCCATTCTGCCTGGGG                                                               |
| Myc-eGFP_HBG1 3'UTR+30A PCR for<br>mRNA template rev   | TTTTTTTTTTTTTTTTTTTTTTTTTTTGTGAAGAA<br>ACTTTCTTTTATTAGGAGCAG                   |
| Flag-eGFP reporter mRNA RT-PCR fwd                     | TGTTCTTTTGCAGGATCCAC                                                           |
| Myc-eGFP reporter mRNA RT-PCR fwd                      | TCTTTTGCAGGATCCCATC                                                            |
| Flag/Myc-eGFP reporter mRNA RT-PCR rev                 | GAACTTCAGGGTCAGCTTGC                                                           |
| λN-tag BamH1 fwd                                       | ATTAGGATCCACCATGGACGCACAAACACGACG                                              |
| λN-tag-Linker BamH1 rev                                | TAATGGATCCACCGGACCCACTTGTGCTACCCGAT<br>CCCTTTGAGTTTGCAGCTTCCATTGAGCTTGT        |
| 5xboxB 3'UTR Asc1 fwd                                  | ATTAGGCGCGCCTAAGTCCAACACTAAACTGGG<br>GAT                                       |
| 5xboxB 3'UTR Xba1 rev                                  | TAATTCTAGACATAATATCCTCGAGATAATATCCTC<br>GATA                                   |
| c-Mos.L qRT-PCR fwd                                    | GAACCTACACTCACCGAGCC                                                           |
| c-Mos.L qRT-PCR rev                                    | AGGCCACTACCGCATAGAGA                                                           |
| CCNB1.S qRT-PCR fwd                                    | AGCTCTTCGGAAACCCACTG                                                           |
| CCNB1.S qRT-PCR rev                                    | AGCTGGTTCTGGTTGCATCT                                                           |
| CCNA1.S qRT-PCR fwd                                    | ATGAAGACACTGCAGGCCAA                                                           |
| CCNA1.S qRT-PCR rev                                    | CCAGTCAGCAACTAGTGTCCA                                                          |
| TPX2.S qRT-PCR fwd                                     | GTGCCTCAGTCTCCTGCTTT                                                           |
| TPX2.S qRT-PCR rev                                     | AAGGGACAAGCCTCCACTTG                                                           |
| BTG4.L qRT-PCR fwd                                     | GCCTTCAGACAGTCTTCTGCC                                                          |
| BTG4.L qRT-PCR rev                                     | GCCATTGGCTAGTTTGGAGC                                                           |
| Wee2.L qRT-PCR fwd                                     | AGGGAGTTGAAAGCCGCTAA                                                           |
| Wee2.L qRT-PCR rev                                     | GCCCAGCGAGGAAAAGAAC                                                            |
| XErp1.L qRT-PCR fwd                                    | GGGTTTATGGGTGGGGCTTT                                                           |
| XErp1.L qRT-PCR rev                                    | TGGCATTAAAGTGCTATGGTTGC                                                        |
| ACTA2.S qRT-PCR fwd                                    | ACCAGAATACGACGAAGCCG                                                           |
| ACTA2.S qRT-PCR rev                                    | TTTTGGAATGAAACGGTGGCG                                                          |
| Hbg1.L qRT-PCR fwd                                     | GACAAGAGGCCCTTGGACG                                                            |
| Hbg1.L qRT-PCR rev                                     | ATGTGCTTGATGGCCTCTCC                                                           |
| Hbg2.S qRT-PCR fwd                                     | GGCTGCTCATGGTGAAAAGG                                                           |
| Hbg2.S qRT-PCR rev                                     | AGTGGTGAGCCAGGGTAATG                                                           |
| cyc8 antisense                                         | G*T*A*CATCTCTTCAT*A*T*T (* denotes<br>phosphothioate)                          |
| cycB5-2 antisense                                      | T*C*C*ATCTGTCCT*G*T*A (* denotes<br>phosphothioate)                            |

|               |                                                    |
|---------------|----------------------------------------------------|
| cyc8 sense    | A*A*T*ATGAAGAGATG*T*A*C (* denotes phosphothioate) |
| cycB5-2 sense | T*A*C*AGGACAGAT*G*G*A (* denotes phosphothioate)   |
